# Supplementary material
Source: PubMed Central journal article supplement (PMC3409282)

## SUPPLEMENTARY MATERIAL

**Figure S1.** Structure and cytotoxicity of axitinib alone in drug-resistant cancer cells and their parental drug sensitive cells, SP cells and non-SP cells.

**Figure S2. The expression of ABCG2, ABCB1 and ABCC1 in drug resistant and their parental sensitive cell lines.** The protein expression of ABCG2, ABCB1 and ABCC1 in S1 (lane 1), HEK293/pcDNA3.1 (lane 2), ABCG2-482-G2 (lane 3) , ABCG2-482-T7 (lane 4), S1-M1-80 (lane 5), KB (lane 6) , KBv200 (lane 7), HL60 (lane 8) and HL60/ADR (lane 9) cell lines without treatment were measured by western blot analysis.

**Figure S3. Potentiation of the antitumor effects of topotecan by axitinib in S1 cell xenograft model in athymic nude mice.** (A) Changes in tumor volume with time. Each point represents the mean  $\pm$  SD of tumor volumes from ten mice in the group. (B) Tumor size. The picture was taken on the 22th day after implantation. (C) Changes in body weight with time after tumor cell inoculation. Each point represents the mean  $\pm$  SD of body weight from ten mice in the group. The various treatments were as follows: (a) saline (q4d  $\times$  4, i.p.); (b) topotecan (q4d  $\times$  4, i.p., 3 mg/kg); (c) axitinib (q4d  $\times$  4, p.o., 25 mg/kg); (d) topotecan (q4d  $\times$  4, i.p., 3 mg/kg) and axitinib (q4d  $\times$  4, p.o., 25 mg/kg) (axitinib was given one hour before topotecan administration).

**Figure S4. SP cells were more tumorigenic.** (A) Tumorigenicity was examined using (NOD/SCID) mice, into which  $1 \times 10^3$ - $1 \times 10^6$  SP or non-SP cells of A549 origin were subcutaneously transplanted. (B) Tumor size. The picture was taken on the 44th day after

implantation.

**Figure S5.** Axitinib targeted to SP cells and enhanced the effect of chemotherapeutical agents on the induction of apoptosis.

**Table 1. Effect of axitinib on reversing ABCG2-mediated drug resistance**

| Compounds          | IC <sub>50</sub> ± SD (μmol/L) (fold-reversal) |        |                 |        |
|--------------------|------------------------------------------------|--------|-----------------|--------|
|                    | S1                                             |        | S1-M1-80(ABCG2) |        |
| Topotecan          | 0.250 ± 0.014                                  | (1.00) | 12.79 ± 0.241   | (1.00) |
| + 0.25 μM Axitinib | 0.249 ± 0.020                                  | (1.01) | 6.692 ± 0.504** | (1.85) |
| + 0.5 μM Axitinib  | 0.255 ± 0.017                                  | (0.98) | 4.964 ± 0.320** | (2.47) |
| + 1.0 μM Axitinib  | 0.199 ± 0.006                                  | (1.26) | 3.020 ± 0.242** | (4.11) |
| + 0.5 μM FTC       | 0.244 ± 0.013                                  | (1.02) | 1.195 ± 0.108** | (10.7) |
| Mitoxantrone       | 0.193 ± 0.021                                  | (1.00) | 14.668 ± 0.636  | (1.00) |
| + 0.25 μM Axitinib | 0.194 ± 0.057                                  | (0.99) | 7.992 ± 0.675** | (1.84) |
| + 0.5 μM Axitinib  | 0.201 ± 0.011                                  | (0.96) | 4.140 ± 0.301** | (3.54) |
| + 1.0 μM Axitinib  | 0.185 ± 0.011                                  | (1.12) | 2.904 ± 0.482** | (5.05) |
| + 0.5 μM FTC       | 0.188 ± 0.011                                  | (1.03) | 1.272 ± 0.056** | (11.5) |
| Cisplatin          | 14.877 ± 1.126                                 | (1.00) | 14.496 ± 1.112  | (1.00) |
| + 1.0 μM Axitinib  | 14.206 ± 1.460                                 | (1.05) | 14.360 ± 1.812  | (1.01) |
|                    | KB                                             |        | KBv200(ABCB1)   |        |
| Doxorubicin        | 0.024 ± 0.002                                  | (1.00) | 2.204 ± 0.108   | (1.00) |
| + 0.25 μM Axitinib | 0.024 ± 0.002                                  | (1.00) | 2.022 ± 0.185   | (1.08) |
| + 0.5 μM Axitinib  | 0.025 ± 0.001                                  | (0.96) | 2.153 ± 0.146   | (1.02) |
| + 1.0 μM Axitinib  | 0.015 ± 0.004*                                 | (1.63) | 1.250 ± 0.215*  | (1.76) |
| + 10 μM Verapamil  | 0.024 ± 0.003                                  | (1.00) | 0.109 ± 0.008** | (20.2) |
| Cispatin           | 1.552 ± 0.121                                  | (1.00) | 2.364 ± 0.241   | (1.00) |
| + 1.0 μM Axitinib  | 1.514 ± 0.117                                  | (1.03) | 2.412 ± 0.225   | (0.98) |
|                    | HL60                                           |        | HL60/ADR(ABCC1) |        |
| Doxorubicin        | 0.055 ± 0.011                                  | (1.00) | 5.725 ± 0.203   | (1.00) |
| + 0.1 μM Axitinib  | 0.054 ± 0.006                                  | (1.02) | 5.719 ± 0.591   | (1.00) |
| + 0.2 μM Axitinib  | 0.056 ± 0.006                                  | (0.98) | 5.759 ± 0.659   | (0.99) |
| + 0.4 μM Axitinib  | 0.049 ± 0.005                                  | (1.13) | 5.476 ± 0.384   | (1.04) |
| + 40 μM MK571      | 0.054 ± 0.005                                  | (1.02) | 1.108 ± 0.182** | (5.17) |

|                    |               |        |                      |        |
|--------------------|---------------|--------|----------------------|--------|
| Cisplatin          | 1.456 ± 0.187 | (1.00) | 1.658 ± 0.118        | (1.00) |
| + 0.4 µM Axitinib  | 1.516 ± 0.125 | (0.96) | 1.524 ± 0.175        | (1.08) |
| SW1573             |               |        | SW1573/2R120(LRP)    |        |
| Doxorubicin        | 0.108 ± 0.012 | (1.00) | 1.266 ± 0.121        | (1.00) |
| + 0.25 µM Axitinib | 0.096 ± 0.004 | (1.12) | 1.214 ± 0.174        | (1.04) |
| + 0.5 µM Axitinib  | 0.098 ± 0.004 | (1.10) | 1.236 ± 0.122        | (1.02) |
| + 1.0 µM Axitinib  | 0.094 ± 0.006 | (1.14) | 1.138 ± 0.088        | (1.11) |
| Cisplatin          | 2.473 ± 0.167 | (1.00) | 9.659 ± 1.073        | (1.00) |
| + 1.0 µM Axitinib  | 2.790 ± 0.147 | (0.89) | 9.180 ± 0.881        | (1.05) |
| NIH3T3             |               |        | NIH3T3/MRP4-2(ABCC4) |        |
| 6-MP               | 0.298 ± 0.050 | (1.00) | 11.852 ± 1.564       | (1.00) |
| + 0.25 µM Axitinib | 0.285 ± 0.034 | (1.04) | 11.145 ± 1.048       | (1.06) |
| + 0.5 µM Axitinib  | 0.318 ± 0.045 | (0.94) | 10.709 ± 1.637       | (1.11) |
| + 1.0 µM Axitinib  | 0.265 ± 0.011 | (1.12) | 12.319 ± 1.704       | (0.96) |
| Cisplatin          | 6.140 ± 0.728 | (1.00) | 5.668 ± 0.690        | (1.00) |
| + 1.0 µM Axitinib  | 5.033 ± 0.296 | (1.21) | 5.842 ± 0.691        | (0.97) |

Cell survival was determined by MTT assays as described in “Materials and Methods”. Data are the mean ± standard deviation (SD) of at least three independent experiments performed in triplicate. The fold-reversal of MDR (values given in parenthesis in last column) was calculated by dividing the IC<sub>50</sub> for cells with the anticancer drugs in the absence of axitinib by that obtained in the presence of axitinib.

\**P* < 0.05, \*\**P* < 0.01 versus the values obtained in the absence of inhibitor

**Table 2. Effect of axitinib on reversing ABCG2-mediated MDR in transfected cell lines**

| Compounds          | IC <sub>50</sub> ± SD (μmol/L) (fold-reversal) |        |               |        |               |        |
|--------------------|------------------------------------------------|--------|---------------|--------|---------------|--------|
|                    | HEK293/pcDNA3.1                                |        | ABCG2-G482-G2 |        | ABCG2-482-T7  |        |
| Mitoxantrone       | 0.029±0.0015                                   | (1.00) | 1.176±0.241   | (1.00) | 1.195±0.301   | (1.00) |
| + 0.25 μM Axitinib | 0.031±0.0024                                   | (0.94) | 0.488±0.085** | (2.41) | 0.338±0.028** | (3.54) |
| + 0.5 μM Axitinib  | 0.041±0.0029                                   | (0.71) | 0.247±0.076** | (4.76) | 0.206±0.013** | (5.80) |
| + 1.0 μM Axitinib  | 0.042±0.0033                                   | (0.70) | 0.079±0.007** | (14.9) | 0.076±0.005** | (15.7) |
| + 0.5 μM FTC       | 0.040±0.0011                                   | (0.73) | 0.138±0.005** | (8.52) | 0.096±0.003** | (12.4) |
| Cisplatin          | 4.069±0.258                                    | (1.00) | 5.141±0.197   | (1.00) | 4.324±0.176** | (1.00) |
| + 1.0 μM Axitinib  | 5.449±0.269                                    | (0.75) | 4.512±0.224   | (1.14) | 5.078±0.209** | (0.85) |

Cell survival was determined by MTT assays as described in “Materials and Methods”. Data are the mean ± standard deviation (SD) of at least three independent experiments performed in triplicate. The fold-reversal of MDR (values given in parenthesis in last column) was calculated by dividing the IC<sub>50</sub> for cells with the anticancer drugs in the absence of axitinib by that obtained in the presence of axitinib.

\**P* < 0.05, \*\**P* < 0.01 versus the values obtained in the absence of inhibitor

Figure S1

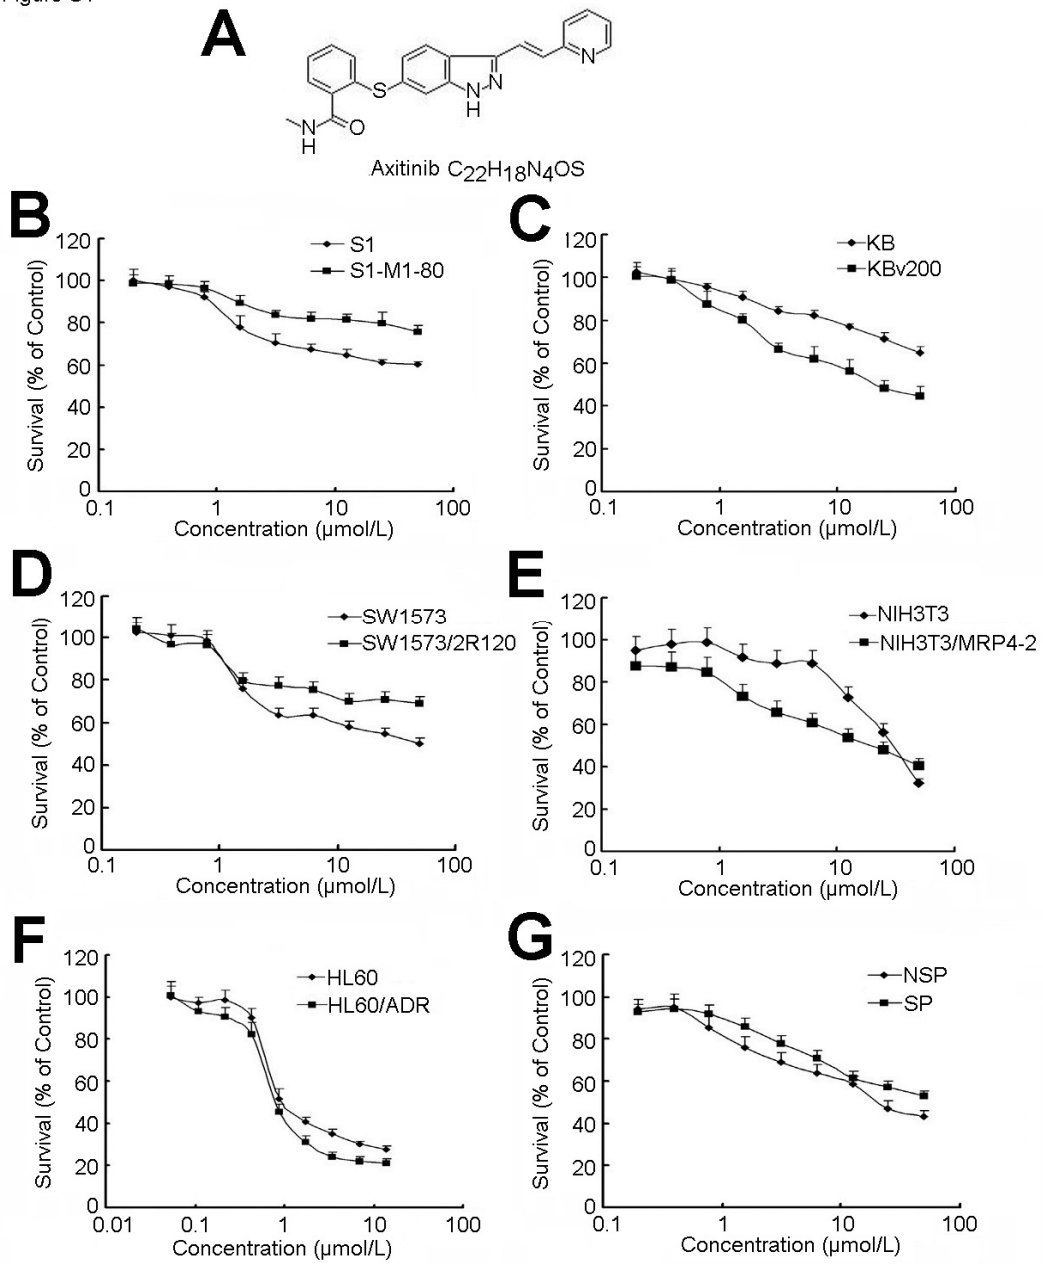

Figure S2

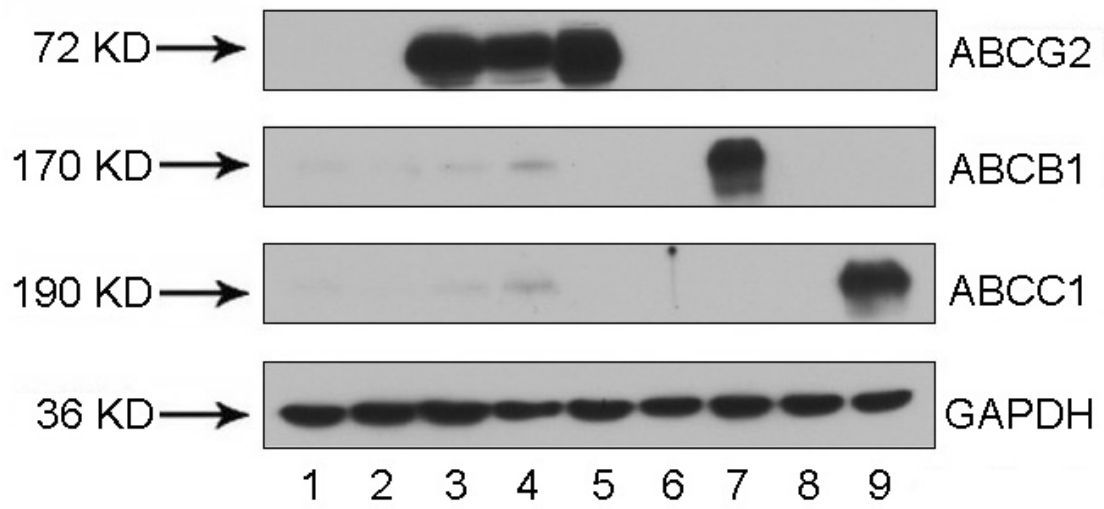

Figure S3

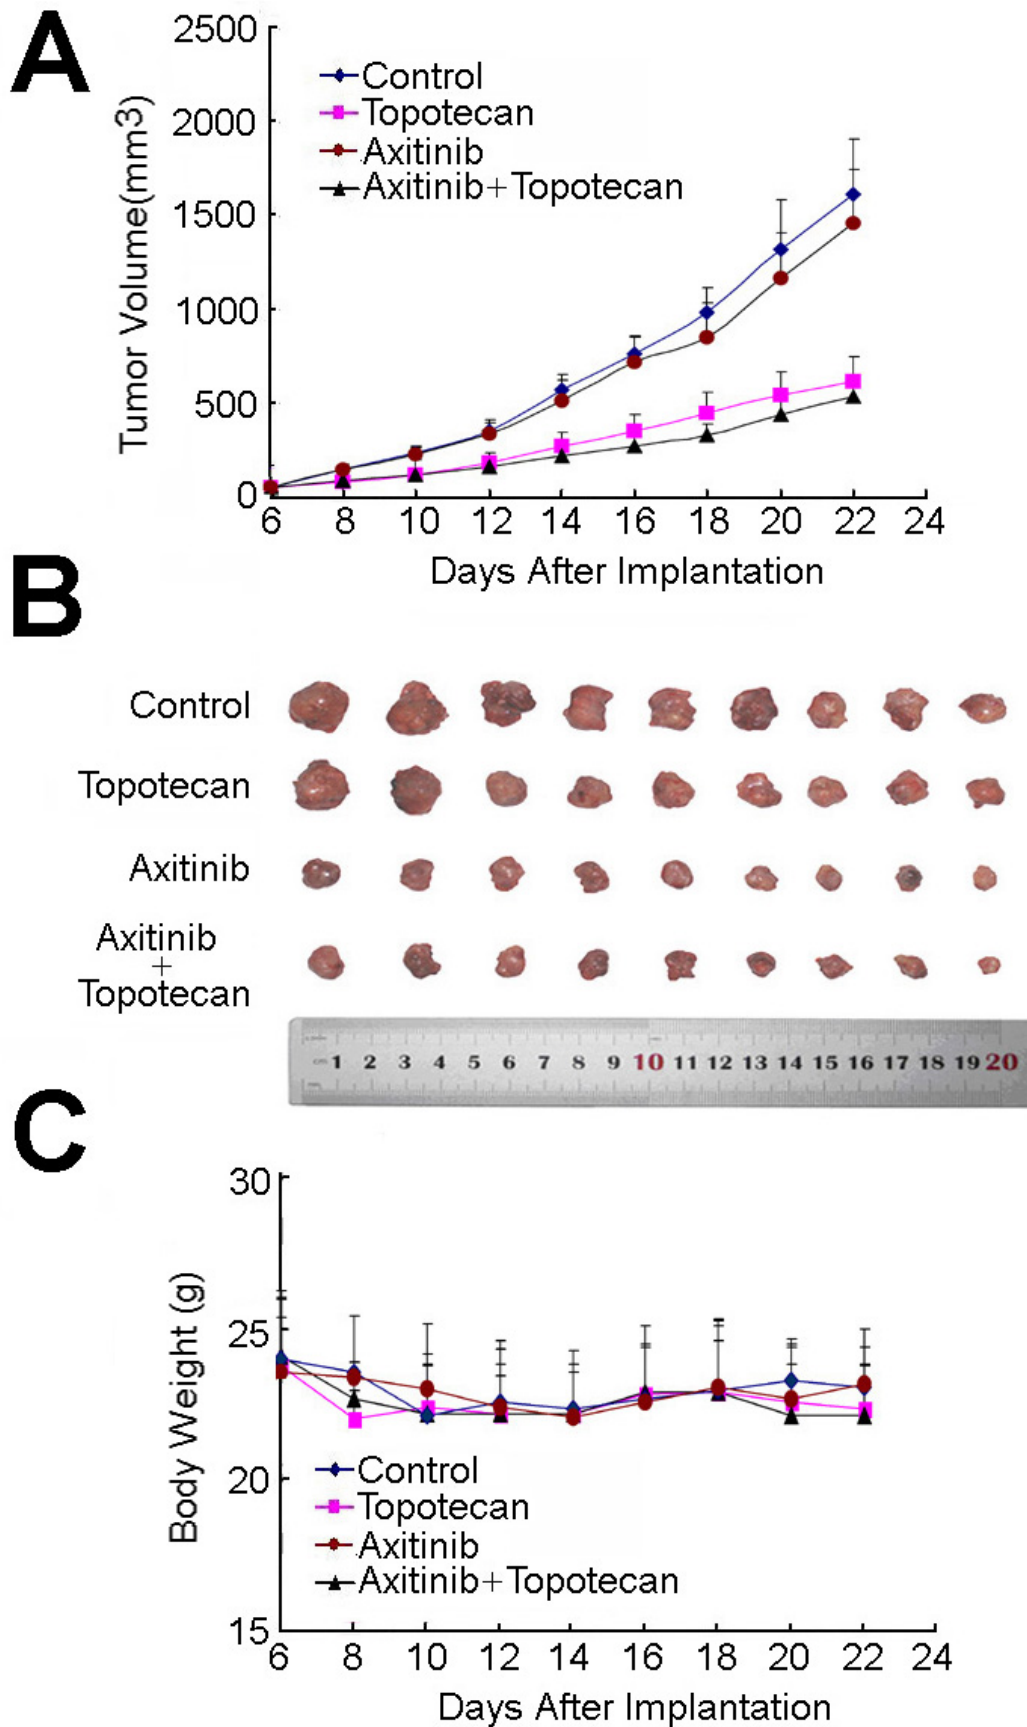

Figure S4

**A** Table 1. SP Is Enriched With Tumorigenic Cells

| Cells | Cell number for injection (tumor volume mm <sup>3</sup> ) |                   |                   |                   |
|-------|-----------------------------------------------------------|-------------------|-------------------|-------------------|
|       | 1×10 <sup>6</sup>                                         | 1×10 <sup>5</sup> | 1×10 <sup>4</sup> | 1×10 <sup>3</sup> |
| SP    | 6/6 (389)                                                 | 3/6 (59)          | 1/6 (39)          | 0/6               |
| NSP   | 6/6 (107)                                                 | 0/6               | 0/6               | 0/6               |

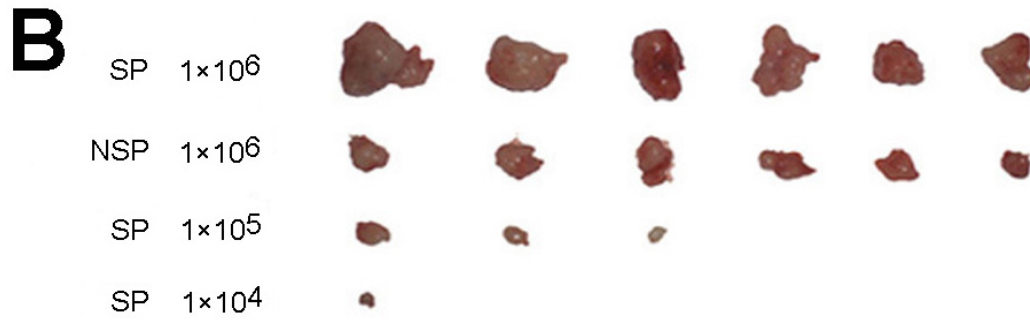



Figure S5

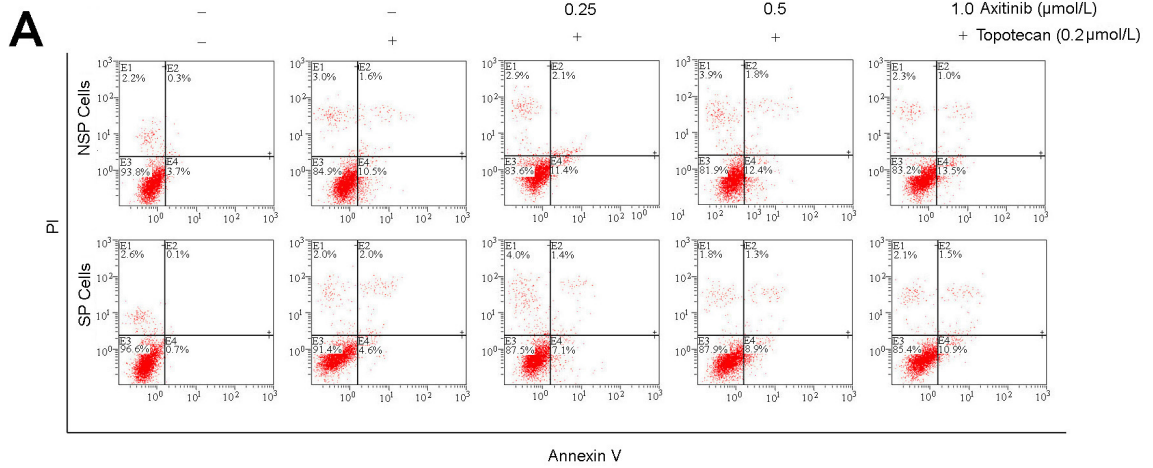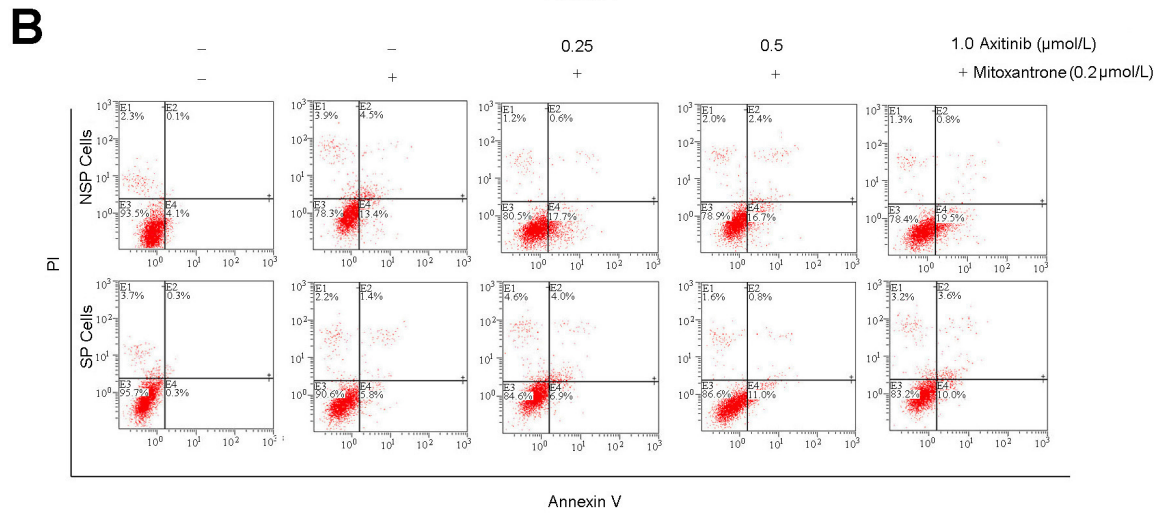

Supplement: 11_444_wang.Suppl.pdf [file 11_444_wang.Suppl.pdf]
